# Supplementary material
Source: ML conference proceedings conference paper supplement (https://openreview.net/forum?id=1fLunL_hDj_)
Supplement: supplementary_material [file attachment]

## A AMD AND DOWNSTREAM PERFORMANCE

We evaluate the relationship between AMD and downstream performance on NMT tasks. We focus on BPE and sample vocabularies with merging sizes varying from 1K to 50K. The relation is evaluated on 12 language-pairs. As shown in Table 1, 42.8% percent of language-pairs with the highest AMD achieve the best BLEU scores. 35.7% percent of language-pairs with the highest AMD achieve almost the best BLEU scores (gap less than 0.3).

Table 1: AMD is related with NMT performance. 42.8% percent language-pairs with the highest AMD achieve the best BLEU scores. 35.7% percent of language-pairs with the highest AMD achieve almost the best BLEU scores (gap less than 0.3).

|             |      | 1K               | 5K              | 10K             | 30K         | 50K       |
|-------------|------|------------------|-----------------|-----------------|-------------|-----------|
| WMT14 En-De | AMD  | -3.33E-3         | -3.66E-4        | <b>9.89E-5</b>  | 6.76E-6     | 3.03E-6   |
|             | BLEU | 29.30            | 29.61           | <b>29.84</b>    | 29.31       | 29.09     |
| WMT16 En-Ro | AMD  | -3.19E-4         | 4.23E-5         | 2.68E-5         | 5.65E-6     | 1.94E-6   |
|             | BLEU | 36.5             | 36.6            | 36.6            | <b>36.9</b> | 36.4      |
| En-Es       | AMD  | -3.89E-04        | 1.20E-05        | <b>1.75E-05</b> | 5.32E-06    | 2.40E-06  |
|             | BLEU | 40.80            | <b>40.98</b>    | 40.78           | 39.97       | 39.75     |
| En-PTbr     | AMD  | -3.82E-04        | 1.20E-05        | <b>1.72E-05</b> | 5.18E-06    | 2.39E-06  |
|             | BLEU | <b>41.32</b>     | 41.24           | 41.10           | 40.32       | 40.01     |
| En-Fr       | AMD  | -3.52E-04        | <b>2.03E-05</b> | 1.82E-05        | 5.07E-06    | 2.20E-06  |
|             | BLEU | 44.40            | 44.91           | <b>44.98</b>    | 43.98       | 43.85     |
| En-Ru       | AMD  | -4.46E-04        | -8.74E-06       | <b>1.24E-05</b> | 5.13E-06    | 2.73E-06  |
|             | BLEU | 19.88            | 20.55           | <b>20.90</b>    | 20.11       | 19.86     |
| En-He       | AMD  | -6.04E-04        | -3.32E-05       | <b>3.61E-06</b> | 3.03E-06    | 1.79E-06  |
|             | BLEU | 29.59            | <b>29.70</b>    | 29.41           | 28.76       | 28.64     |
| En-Ar       | AMD  | -5.55E-04        | -3.42E-05       | <b>3.86E-06</b> | 3.26E-06    | 1.91E-06  |
|             | BLEU | 18.82            | <b>19.21</b>    | 18.83           | 18.25       | 17.92     |
| En-Ko       | AMD  | <b>-3.28E-04</b> | -3.35E-05       | -6.45E-06       | -7.39E-07   | -4.34E-08 |
|             | BLEU | 10.67            | 10.82           | <b>10.94</b>    | 10.40       | 10.21     |
| En-It       | AMD  | -4.01E-04        | 2.35E-06        | <b>1.45E-05</b> | 5.86E-06    | 3.46E-06  |
|             | BLEU | 37.07            | <b>37.50</b>    | 37.43           | 36.88       | 36.56     |
| En-Nl       | AMD  | -4.00E-04        | 1.59E-05        | <b>1.83E-05</b> | 5.38E-06    | 2.49E-06  |
|             | BLEU | <b>34.21</b>     | 34.05           | 33.84           | 33.42       | 33.38     |
| En-Ro       | AMD  | -4.53E-04        | 2.36E-06        | <b>1.48E-05</b> | 5.18E-06    | 2.58E-06  |
|             | BLEU | 29.49            | 29.46           | <b>29.65</b>    | 28.50       | 28.66     |
| En-Tr       | AMD  | -3.94E-04        | 6.11E-06        | <b>1.57E-05</b> | 5.27E-06    | 2.64E-06  |
|             | BLEU | 20.21            | <b>20.30</b>    | 19.75           | 19.12       | 19.01     |
| En-De       | AMD  | -3.82E-04        | 1.10E-05        | <b>1.80E-05</b> | 6.04E-06    | 2.93E-06  |
|             | BLEU | 31.38            | 31.36           | <b>31.50</b>    | 30.28       | 30.11     |

## B PROOFS FOR EQ.10

$$\begin{aligned}
\sum_{i \in \mathbb{T}} P(i) \log P(i) &= \sum_{i \in \mathbb{T}} \sum_{j \in \mathbb{C}} P(i, j) \log P(i) \\
&= \sum_{i \in \mathbb{T}} \sum_{j \in \mathbb{C}} P(i, j) \log P(i, j) \cdot \frac{P(i)}{P(i, j)} \\
&= \sum_{i \in \mathbb{T}} \sum_{j \in \mathbb{C}} P(i, j) \log P(i, j) + \sum_{i \in \mathbb{T}} \sum_{j \in \mathbb{C}} P(i, j) \log \frac{P(i)}{P(i, j)} \\
&= \underbrace{\sum_{i \in \mathbb{T}} \sum_{j \in \mathbb{C}} P(i, j) \log P(i, j)}_{\mathcal{L}_1} + \underbrace{\sum_{i \in \mathbb{T}} \sum_{j \in \mathbb{C}} P(i, j) (-\log P(j|i))}_{\mathcal{L}_2}.
\end{aligned}$$

□

---

## C ISO LANGUAGE CODE

The language names and their corresponding language codes according to ISO 639-1 standard are listed in Table 2.

Table 2: ISO Language code

|      |            |
|------|------------|
| Es   | Spanish    |
| Ptbr | Portuguese |
| Fr   | French     |
| Ru   | Russian    |
| He   | Hebrew     |
| Ar   | Arabic     |
| Ko   | Korean     |
| It   | Italian    |
| Nl   | Dutch      |
| Tr   | Turkish    |
| De   | German     |
| Ro   | Romanian   |
